# Supplementary material for: A Computing Method for Sand Inrush Quantity through a Borehole in Longde Coal Mine
Source: Hindawi journal article supplement (doi:10.1155/2018/4842939), 2018-01-01
Supplement: f1 [file 4842939.f1.pdf]

## Supplementary material

Table 1. Data of surface sand pit

| Point | After 70.5 h/m |            | After 118.5 h/m |            | After 190.5 h/m |            | After 238.5 h/m |            |
|-------|----------------|------------|-----------------|------------|-----------------|------------|-----------------|------------|
|       | x position     | y position | x position      | y position | x position      | y position | x position      | y position |
| C1    | 0              | 0          | -0.113          | -0.1       | -0.086          | -0.105     | -0.11           | -0.131     |
| C2    | -36.892        | 32.298     | -37.029         | 32.066     | -37.027         | 32.069     | -37.059         | 32.034     |
| C3    | -7.321         | -105.796   | -6.767          | -104.895   | -6.764          | -104.891   | -6.789          | -104.913   |
| C4    | -61.538        | -137.435   | -61.534         | -137.488   | -61.524         | -137.486   | -61.559         | -137.516   |
| C5    | 150.491        | -88.188    | 150.381         | -88.234    | 150.442         | -88.226    | 150.377         | -88.263    |
| C6    | 165.224        | -102.681   | 165.196         | -102.725   | 165.207         | -102.715   | 165.182         | -102.749   |
| C7    | 131.797        | 40.691     | 131.746         | 40.63      | 131.802         | 40.637     | 131.745         | 40.595     |

Table 2. Data of water volume flux

|                                       |       |       |       |       |       |       |       |       |       |       |       |
|---------------------------------------|-------|-------|-------|-------|-------|-------|-------|-------|-------|-------|-------|
| time/h                                | 12.43 | 14.75 | 15.25 | 16.92 | 18.62 | 21.17 | 22.27 | 24.22 | 25.18 | 27.42 | 27.98 |
| water volume flux/(m <sup>3</sup> /h) | 12.29 | 7.12  | 4.45  | 4.35  | 5.07  | 0.22  | -0.40 | -0.43 | -0.26 | -0.25 | 0.38  |
| time/h                                | 28.50 | 28.92 | 31.93 | 33.18 | 35.03 | 35.80 | 38.47 | 39.10 | 41.77 | 42.57 | 44.97 |
| water volume flux/(m <sup>3</sup> /h) | 3.03  | 0.68  | 0.54  | 0.30  | 0.26  | 0.23  | 0.00  | 0.28  | 0.00  | 0.33  | 0.34  |

Table 3. Waterline data of Wusu group aquifer

| Date   | Waterline of Wusu group aquifer/m |          |          |          |
|--------|-----------------------------------|----------|----------|----------|
|        | J1                                | J2       | J3       | S4       |
| Sep.4  | 1204.825                          | 1200.955 | 1204.285 |          |
| Sep.19 | 1201.725                          | 1192.455 | 1205.335 |          |
| Oct.5  | 1195.425                          | 1191.355 | 1203.335 |          |
| Oct.18 | 1193.925                          | 1191.355 | 1201.785 |          |
| Oct.29 | 1193.825                          | 1191.555 | 1200.285 | 1207.215 |
| Nov.15 |                                   |          | 1197.885 | 1207.215 |
| Nov.23 |                                   |          | 1197.385 |          |
| Nov.25 |                                   |          | 1197.185 |          |

Table 4. Density data of sand-water mixture flow

|                                                        |       |       |       |       |       |       |       |       |       |       |       |       |
|--------------------------------------------------------|-------|-------|-------|-------|-------|-------|-------|-------|-------|-------|-------|-------|
| Volume concentration of sand                           | 0.029 | 0.057 | 0.108 | 0.195 | 0.266 | 0.326 | 0.377 | 0.421 | 0.459 | 0.492 | 0.521 | 0.548 |
| Density of sand-water mixture<br>/(kg/m <sup>3</sup> ) | 1019  | 1048  | 1101  | 1217  | 1301  | 1374  | 1449  | 1507  | 1558  | 1625  | 1677  | 1695  |
| Volume concentration of sand                           | 0.571 | 0.592 | 0.611 | 0.629 | 0.645 | 0.659 | 0.673 | 0.685 | 0.697 | 0.708 | 0.718 | 0.727 |
| Density of sand-water mixture<br>/(kg/m <sup>3</sup> ) | 1739  | 1780  | 1818  | 1854  | 1860  | 1883  | 1921  | 1941  | 1959  | 1969  | 1992  | 2022  |
| Volume concentration of sand                           | 0.736 | 0.744 | 0.752 | 0.769 | 0.784 | 0.787 | 0.797 | 0.809 | 0.819 | 0.829 | 0.837 | 0.845 |
| Density of sand-water mixture<br>/(kg/m <sup>3</sup> ) | 2057  | 2069  | 2077  | 2096  | 2088  | 2078  | 2057  | 2014  | 1974  | 1971  | 1952  | 1935  |
| Volume concentration of sand                           | 0.852 | 0.858 | 0.864 | 0.869 | 0.874 | 0.879 | 0.883 | 0.887 | 0.891 | 0.894 | 0.898 | 0.901 |
| Density of sand-water mixture<br>/(kg/m <sup>3</sup> ) | 1921  | 1907  | 1895  | 1884  | 1874  | 1865  | 1856  | 1848  | 1841  | 1834  | 1828  | 1822  |
| Volume concentration of sand                           | 0.904 | 0.906 | 0.909 | 0.911 | 0.914 | 0.916 | 0.918 | 0.920 | 0.922 |       |       |       |
| Density of sand-water mixture<br>/(kg/m <sup>3</sup> ) | 1817  | 1812  | 1807  | 1802  | 1798  | 1794  | 1790  | 1786  | 1783  |       |       |       |

Table 5. Dynamic viscosity data of sand-water mixture flow

|                                                   |      |      |      |      |      |      |      |      |      |      |      |
|---------------------------------------------------|------|------|------|------|------|------|------|------|------|------|------|
| Volume concentration of sand                      | 0.03 | 0.06 | 0.11 | 0.19 | 0.27 | 0.33 | 0.38 | 0.42 | 0.46 | 0.49 | 0.52 |
| Dynamic viscosity ratio of sand-<br>water mixture | 1.1  | 1.2  | 1.3  | 1.7  | 2.1  | 2.8  | 3.1  | 3.4  | 4.4  | 5.2  | 6.1  |
| Volume concentration of sand                      | 0.55 | 0.57 | 0.59 | 0.61 | 0.63 | 0.64 | 0.66 | 0.67 | 0.69 | 0.70 | 0.71 |
| Dynamic viscosity ratio of sand-<br>water mixture | 6.7  | 7.3  | 7.5  | 8    | 8.2  | 8.4  | 8.6  | 8.7  | 8.9  | 9    | 9.1  |
| Volume concentration of sand                      | 0.72 | 0.73 | 0.74 | 0.74 | 0.75 | 0.77 | 0.78 | 0.79 | 0.80 |      |      |
| Dynamic viscosity ratio of sand-<br>water mixture | 9.2  | 9.2  | 9.3  | 9.4  | 9.4  | 9.5  | 9.7  | 9.7  | 9.7  |      |      |
